# Supplementary material for: Single-stage Laparoscopic Proctocolectomy with Ileal pouch-anal Anastomosis for Familial Adenomatous Polyposis
Source: Research Square preprint supplement (doi:10.21203/rs.3.rs-7677571/v1), 2025-10-09
Supplement: Supplementary file 1 [file 980334198e3997228ba3575f.docx]

**Supplementary Table 1.** Missingness for all variables with non-zero missingness

| Variable | Missingness  n (%) |
| --- | --- |
| Demographics |  |
| BMI, kg/m2 | 1 (2.6) |
| Race | 1 (2.6) |
| Long-term follow-up |  |
| Follow-up length, years | 7 (18.0) |
| Presence of daily bowel movement | 7 (18.0) |
| Average daily bowel movements | 17 (43.6) |
| Normal stool consistency | 7 (18.0) |
| Constipation | 7 (18.0) |
| Abdominal pain | 7 (18.0) |
| Nausea | 7 (18.0) |
| Vomiting | 7 (18.0) |
| Decreased appetite | 7 (18.0) |
